# Supplementary material for: Green and cytocompatible carboxyl modified gold–lysozyme nanoantibacterial for combating multidrug-resistant superbugs
Source: Royal Society of Chemistry journal article supplement (doi:10.1039/c9bm00935c), 2019-01-01
Supplement: c9bm00935c1.pdf [file c9bm00935c1.pdf]

## Supporting Information

### **Green and cytocompatible carboxyl modified gold-lysozyme nanoantibacterial for combating multidrug-resistant superbugs**

Islam M. Ahmady,<sup>a</sup> Mehavesh K. Hameed,<sup>b</sup> Ahmed M. Almeهدي,<sup>b</sup> Mahreen Arooj,<sup>b</sup>  
Bizuneh Workie,<sup>c</sup> Endalkachew Sahle-Demessie,<sup>d</sup> Changseok Han,<sup>e</sup> Ahmed A.  
Mohamed<sup>b,\*</sup>

---

<sup>a.</sup> *Department of Applied Biology, University of Sharjah, Sharjah 27272, United Arab Emirates*

<sup>b.</sup> *Centre for Advanced Materials Research, Research Institute for Science and Engineering, University of Sharjah, Sharjah 27272, United Arab Emirates*

<sup>c.</sup> *Department of Chemistry, Delaware State University, 1200 North DuPont Highway, Dover, Delaware 19901, United States*

<sup>d.</sup> *The U.S. Environmental Protection Agency, ORD, NRMRL, LMMD, MMB, 26 W. Martin Luther King Jr. Drive, Cincinnati, Ohio 45268, United States*

<sup>e</sup> *Department of Environmental Engineering, INHA University, Michuhol-gu, 100 Inha-ro, Incheon 22212, Republic of Korea*

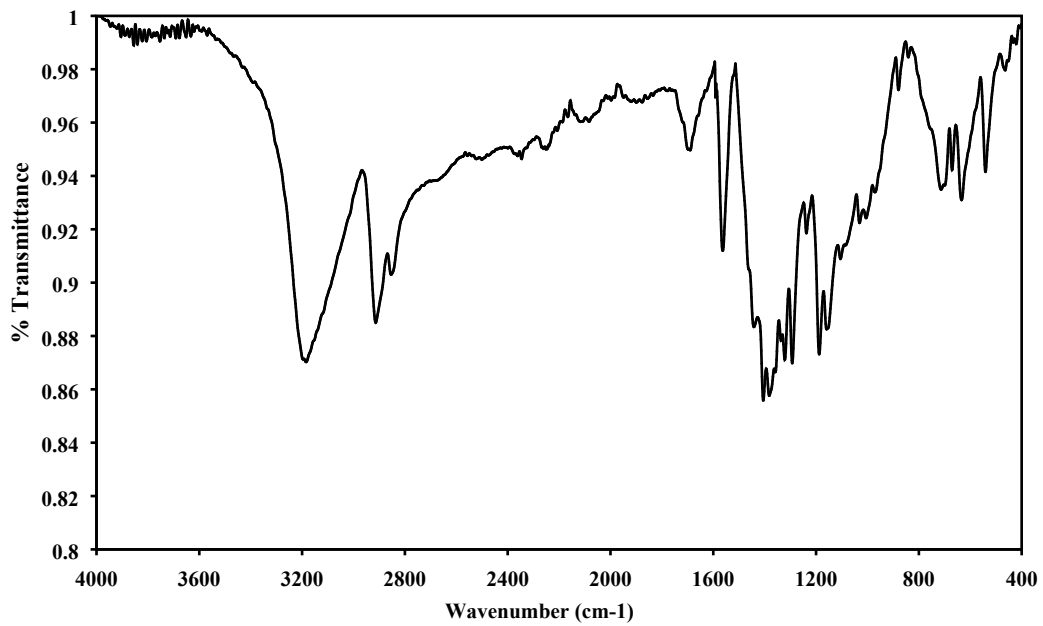

**Figure S1.** ATR-FTIR of AuNPs-COOH in solid state

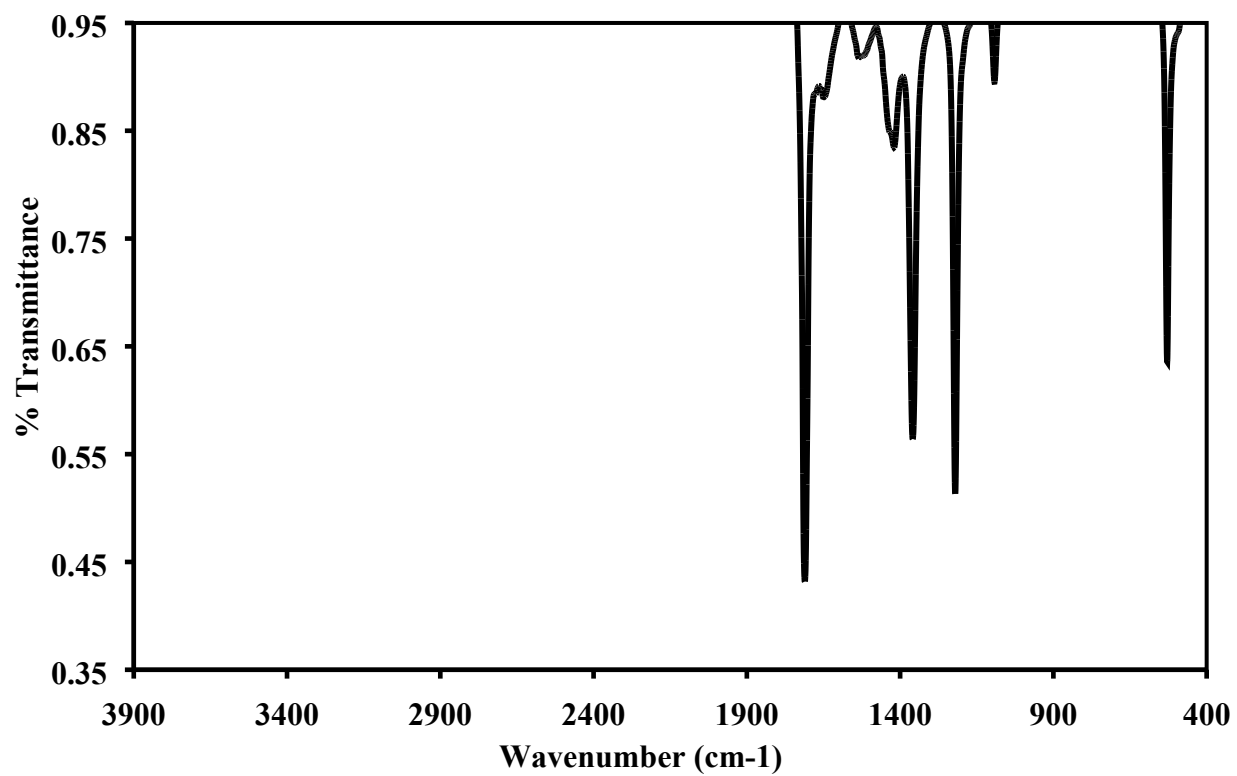

**Figure S2.** ATR-FTIR of lysozyme in solid state

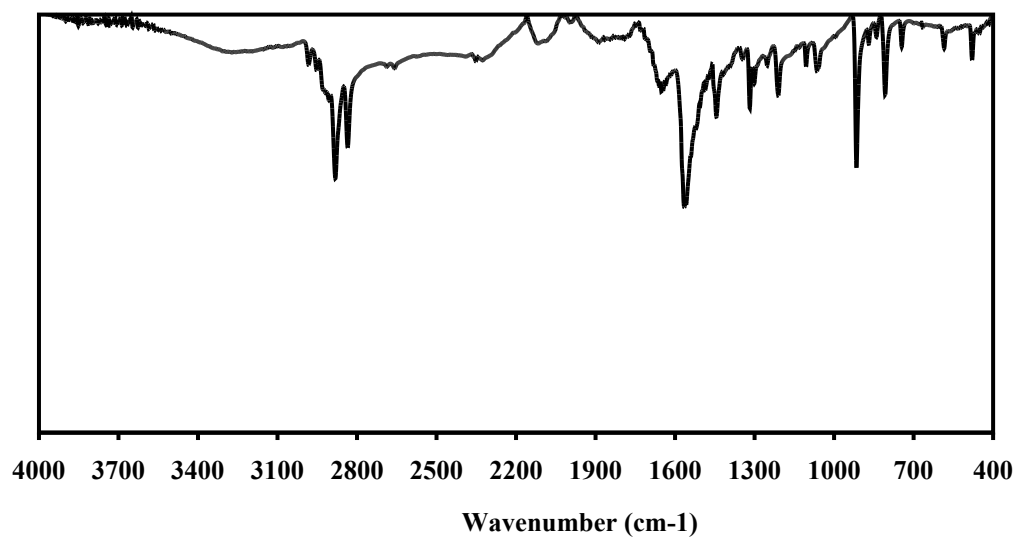

**Figure S3.** ATR-FTIR of AuNPs-lysozyme in solid state

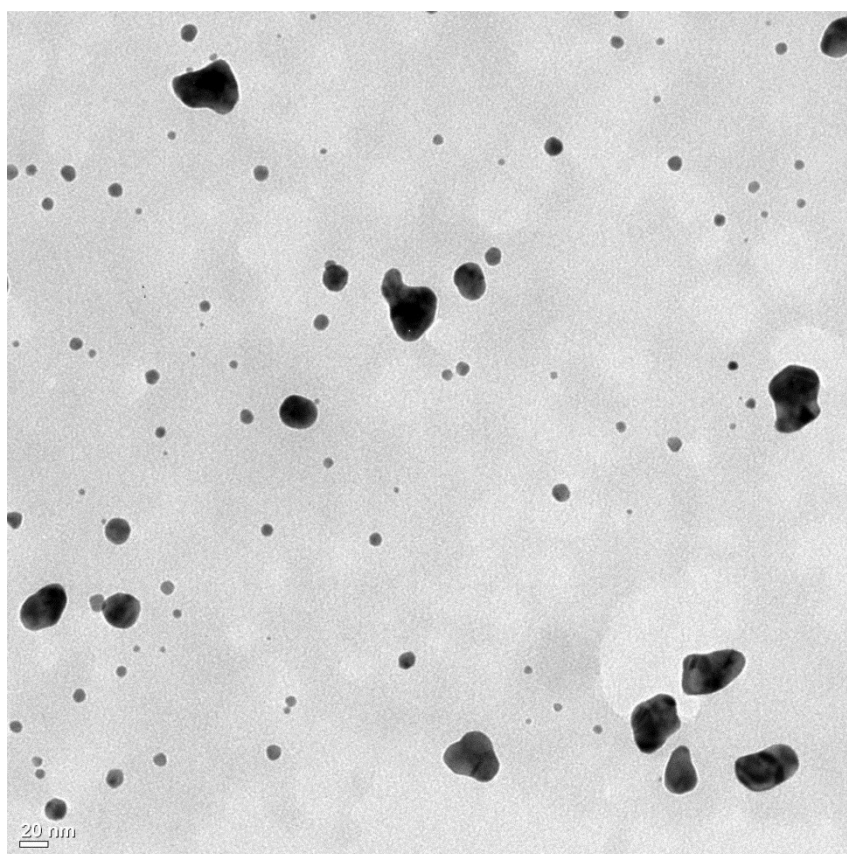

**Figure S4.** TEM image of AuNPs-lysozyme
